# Supplementary material for: Study of the Photocatalytic Activity of TiO2 and Fe2+ in the Activation of Peroxymonosulfate
Source: MDPI journal article supplement (doi:10.3390/w13202860), 2021-10-13
Supplement: s1 [file s1]

**Supplementary material**

**Study of the Photocatalytic Activity of TiO<sub>2</sub> and Fe<sup>2+</sup> in  
the Activation of Peroxymonosulfate**

Rodrigo González-Quiles, Juan Manuel de Andrés, Jorge Rodríguez-Chueca \*

Department of Industrial Chemical & Environmental Engineering, Escuela Técnica

Superior de Ingenieros Industriales, Universidad Politécnica de Madrid, Calle José

Gutiérrez Abascal 2, 28006, Madrid, Spain.

**\*CORRESPONDING AUTHOR:**

Dr. Jorge Rodríguez-Chueca

Phone: + 34 910 677 334

E-mail: [jorge.rodriguez.chueca@upm.es](mailto:jorge.rodriguez.chueca@upm.es)

**Table S1.** Analysis of variance (ANOVA) for the different factor combination (PMS, Fe<sup>2+</sup> and TiO<sub>2</sub>). The degrees of freedom used (df), the sum of squares, the mean square and the F and p values are shown.

a) Considering 10 minutes after treatment in combination with UV-A radiation.

| Radiation | Source                                 | df | Sum of squares | Mean squares | F-value | p-value |
|-----------|----------------------------------------|----|----------------|--------------|---------|---------|
| UV-A      | Model                                  | 8  | 2.0109         | 0.2514       | 340.52  | 0.000   |
|           | Linear                                 | 3  | 1.7109         | 0.5703       | 772.60  | 0.000   |
|           | PMS                                    | 1  | 1.1650         | 1.1650       | 1578.29 | 0.000   |
|           | TiO <sub>2</sub>                       | 1  | 0.2769         | 0.2769       | 375.07  | 0.000   |
|           | Fe <sup>2+</sup>                       | 1  | 0.2690         | 0.2690       | 364.43  | 0.000   |
|           | 2-Way Interactions                     | 3  | 0.1552         | 0.0517       | 70.08   | 0.000   |
|           | PMS/TiO <sub>2</sub>                   | 1  | 0.0600         | 0.0600       | 81.23   | 0.000   |
|           | PMS/Fe <sup>2+</sup>                   | 1  | 0.0896         | 0.0896       | 121.40  | 0.000   |
|           | TiO <sub>2</sub> /Fe <sup>2+</sup>     | 1  | 0.0056         | 0.0056       | 7.60    | 0.025   |
|           | 3-Way Interactions                     | 1  | 0.0104         | 0.0104       | 14.16   | 0.006   |
|           | PMS/TiO <sub>2</sub> /Fe <sup>2+</sup> | 1  | 0.0104         | 0.0104       | 14.16   | 0.006   |
|           | Curvature                              | 1  | 0.1344         | 0.1344       | 182.00  | 0.000   |
|           | Error                                  | 8  | 0.0059         | 0.0007       |         |         |
|           | Total                                  | 16 | 2.0168         |              |         |         |

b) considering 10 minutes after treatment in combination with UV-C radiation.

| Radiation | Source                                 | df | Sum of squares | Mean squares | F-value | p-value |
|-----------|----------------------------------------|----|----------------|--------------|---------|---------|
| UV-C      | Model                                  | 8  | 2.0919         | 0.2615       | 69.16   | 0.000   |
|           | Linear                                 | 3  | 1.7926         | 0.5975       | 158.04  | 0.000   |
|           | PMS                                    | 1  | 0.8638         | 0.8638       | 228.46  | 0.000   |
|           | TiO <sub>2</sub>                       | 1  | 0.7044         | 0.7044       | 186.31  | 0.000   |
|           | Fe <sup>2+</sup>                       | 1  | 0.2244         | 0.2244       | 59.35   | 0.000   |
|           | 2-Way Interactions                     | 3  | 0.1325         | 0.0442       | 11.68   | 0.003   |
|           | PMS/TiO <sub>2</sub>                   | 1  | 0.1068         | 0.1068       | 28.23   | 0.001   |
|           | PMS/Fe <sup>2+</sup>                   | 1  | 0.0085         | 0.0085       | 2.25    | 0.172   |
|           | TiO <sub>2</sub> /Fe <sup>2+</sup>     | 1  | 0.0173         | 0.0173       | 4.57    | 0.065   |
|           | 3-Way Interactions                     | 1  | 0.1453         | 0.1453       | 38.42   | 0.000   |
|           | PMS/TiO <sub>2</sub> /Fe <sup>2+</sup> | 1  | 0.1453         | 0.1453       | 38.42   | 0.000   |
|           | Curvature                              | 1  | 0.0215         | 0.0215       | 5.69    | 0.044   |
|           | Error                                  | 8  | 0.0302         | 0.0038       |         |         |
|           | Total                                  | 16 | 2.1221         |              |         |         |

c) considering 5 minutes after treatment in combination with UV-A radiation.

| Radiation | Source                                 | df | Sum of squares | Mean squares | F-value | p-value |
|-----------|----------------------------------------|----|----------------|--------------|---------|---------|
| UV-A      | Model                                  | 8  | 1.7256         | 0.2157       | 216.22  | 0.000   |
|           | Linear                                 | 3  | 1.4186         | 0.4729       | 474.02  | 0.000   |
|           | PMS                                    | 1  | 0.8883         | 0.8883       | 890.49  | 0.000   |
|           | TiO <sub>2</sub>                       | 1  | 0.2440         | 0.2440       | 244.59  | 0.000   |
|           | Fe <sup>2+</sup>                       | 1  | 0.2863         | 0.2863       | 286.99  | 0.000   |
|           | 2-Way Interactions                     | 3  | 0.2925         | 0.0975       | 97.73   | 0.000   |
|           | PMS/TiO <sub>2</sub>                   | 1  | 0.1051         | 0.1051       | 105.39  | 0.000   |
|           | PMS/Fe <sup>2+</sup>                   | 1  | 0.1610         | 0.1610       | 161.40  | 0.000   |
|           | TiO <sub>2</sub> /Fe <sup>2+</sup>     | 1  | 0.0263         | 0.0263       | 26.39   | 0.001   |
|           | 3-Way Interactions                     | 1  | 0.0015         | 0.0015       | 1.53    | 0.252   |
|           | PMS/TiO <sub>2</sub> /Fe <sup>2+</sup> | 1  | 0.0015         | 0.0015       | 1.53    | 0.252   |
|           | Curvature                              | 1  | 0.0130         | 0.0130       | 13.00   | 0.007   |
|           | Error                                  | 8  | 0.0080         | 0.0010       |         |         |
|           | Total                                  | 16 | 1.7336         |              |         |         |

d) considering 5 minutes after treatment in combination with UV-C radiation.

| Radiation | Source                                 | df | Sum of squares | Mean squares | F-value | p-value |
|-----------|----------------------------------------|----|----------------|--------------|---------|---------|
| UV-C      | Model                                  | 8  | 2.3672         | 0.2959       | 43.54   | 0.000   |
|           | Linear                                 | 3  | 2.0315         | 0.6772       | 99.63   | 0.000   |
|           | PMS                                    | 1  | 1.0743         | 1.0743       | 158.07  | 0.000   |
|           | TiO <sub>2</sub>                       | 1  | 0.5424         | 0.5424       | 79.80   | 0.000   |
|           | Fe <sup>2+</sup>                       | 1  | 0.4148         | 0.4148       | 61.03   | 0.000   |
|           | 2-Way Interactions                     | 3  | 0.1194         | 0.0398       | 5.86    | 0.020   |
|           | PMS/TiO <sub>2</sub>                   | 1  | 0.0041         | 0.0041       | 0.61    | 0.458   |
|           | PMS/Fe <sup>2+</sup>                   | 1  | 0.0752         | 0.0752       | 11.06   | 0.010   |
|           | TiO <sub>2</sub> /Fe <sup>2+</sup>     | 1  | 0.0401         | 0.0401       | 5.90    | 0.041   |
|           | 3-Way Interactions                     | 1  | 0.2039         | 0.2039       | 30.00   | 0.001   |
|           | PMS/TiO <sub>2</sub> /Fe <sup>2+</sup> | 1  | 0.2039         | 0.2039       | 30.00   | 0.001   |
|           | Curvature                              | 1  | 0.0124         | 0.0124       | 1.83    | 0.213   |
|           | Error                                  | 8  | 0.0544         | 0.0068       |         |         |
|           | Total                                  | 16 | 2.4216         |              |         |         |

**Table S2.** Standardised effects for the different factor combination (PMS, Fe<sup>2+</sup> and TiO<sub>2</sub>). Estimated numerical regression effects, regression coefficients, standard error (SE), standardised effects (t-value) and p-value, for student's t-test, are shown.

a) at 10 minutes of treatment in combination with UV-A radiation.

| Radiation | Term                                   | Effect  | Coeff.  | Coeff.<br>SE | T value | P value | VIF  |
|-----------|----------------------------------------|---------|---------|--------------|---------|---------|------|
| UV-A      | Constant                               |         | 0.3397  | 0.0068       | 50.02   | 0.000   |      |
|           | PMS                                    | 0.5397  | 0.2698  | 0.0068       | 39.73   | 0.000   | 1.00 |
|           | TiO <sub>2</sub>                       | 0.2631  | 0.1315  | 0.0068       | 19.37   | 0.000   | 1.00 |
|           | Fe <sup>2+</sup>                       | 0.2593  | 0.1297  | 0.0068       | 19.09   | 0.000   | 1.00 |
|           | PMS/TiO <sub>2</sub>                   | 0.1224  | 0.0612  | 0.0068       | 9.01    | 0.000   | 1.00 |
|           | PMS/Fe <sup>2+</sup>                   | 0.1497  | 0.0748  | 0.0068       | 11.02   | 0.000   | 1.00 |
|           | TiO <sub>2</sub> /Fe <sup>2+</sup>     | 0.0374  | 0.0187  | 0.0068       | 2.76    | 0.025   | 1.00 |
|           | PMS/TiO <sub>2</sub> /Fe <sup>2+</sup> | -0.0511 | -0.0255 | 0.0068       | -3.76   | 0.006   | 1.00 |
|           | Central point                          |         | 0.3778  | 0.0280       | 13.49   | 0.000   | 1.00 |

b) at 10 minutes of treatment in combination with UV-C radiation.

| Radiation | Term                                   | Effect  | Coeff.  | Coeff.<br>SE | T value | P value | VIF  |
|-----------|----------------------------------------|---------|---------|--------------|---------|---------|------|
| UV-A      | Constant                               |         | 0.6262  | 0.0154       | 40.73   | 0.000   |      |
|           | PMS                                    | 0.4647  | 0.2324  | 0.0154       | 15.12   | 0.000   | 1.00 |
|           | TiO <sub>2</sub>                       | 0.4196  | 0.2098  | 0.0154       | 13.65   | 0.000   | 1.00 |
|           | Fe <sup>2+</sup>                       | 0.2368  | 0.1184  | 0.0154       | 7.70    | 0.000   | 1.00 |
|           | PMS/TiO <sub>2</sub>                   | -0.1634 | -0.0817 | 0.0154       | -5.31   | 0.001   | 1.00 |
|           | PMS/Fe <sup>2+</sup>                   | 0.0461  | 0.0230  | 0.0154       | 1.50    | 0.172   | 1.00 |
|           | TiO <sub>2</sub> /Fe <sup>2+</sup>     | -0.0657 | -0.0329 | 0.0154       | -2.14   | 0.065   | 1.00 |
|           | PMS/TiO <sub>2</sub> /Fe <sup>2+</sup> | -0.1906 | -0.0953 | 0.0154       | -6.20   | 0.000   | 1.00 |
|           | Central point                          |         | -0.1511 | 0.0634       | -2.38   | 0.044   | 1.00 |
